# Supplementary material for: Phosphaalkenyl germylenes and their gold, tungsten and molybdenum complexes
Source: Royal Society of Chemistry journal article supplement (doi:10.1039/c2cc17551g), 2012-01-01
Supplement: c2cc17551g.pdf [file c2cc17551g.pdf]

## Supporting Information

### Phosphaalkenyl germylenes and their gold, tungsten and molybdenum complexes

Dimitri Matioszek, Tibor-Gabor Kocsor, Annie Castel\*, Gabriela Nemes\*, Jean Escudié, Nathalie Saffon

#### General procedure

All manipulations with air-sensitive materials were performed in a dry and oxygen-free atmosphere of argon by using standard Schlenk-line and glove-box techniques. Solvents were purified with the MBRAUN SBS-800 purification system except THF which was distilled upon Na/benzophenone. NMR spectra were recorded with a Bruker Avance II 300:  $^1\text{H}$  (300.13MHz),  $^{13}\text{C}$  (74.48 MHz),  $^{31}\text{P}$  (121.50 MHz) at 298 K in  $\text{C}_6\text{D}_6$  or in  $\text{CD}_2\text{Cl}_2$ . Chemical shifts are expressed in parts per million with residual solvent signals as internal reference ( $^1\text{H}$  and  $^{13}\text{C}\{^1\text{H}\}$ ) or with an external reference ( $\text{H}_3\text{PO}_4$  for  $^{31}\text{P}$ ). NMR assignments were confirmed by COSY ( $^1\text{H}$ ), HSQC ( $^1\text{H}$ - $^{13}\text{C}$ ), and HMBC ( $^1\text{H}$ - $^{13}\text{C}$ ) experiments. Melting points were measured with a sealed capillary using the Stuart automatic melting point SMP40 apparatus. The compounds  $(\text{NHC})\text{GeCl}_2^1$  and  $\text{Mes}^*\text{P}=\text{CCl}_2^2$  were prepared according to literature procedures.

#### Synthesis of bis(phosphaalkenyl) germylene 1:

To a solution of  $\text{Mes}^*\text{P}=\text{C}(\text{Li})\text{Cl}$  (1.64 mmol) in THF (6 mL) freshly prepared and cooled at  $-90\text{ }^\circ\text{C}$  was added a suspension of  $(\text{NHC})\text{GeCl}_2$  (0.27 g, 0.82 mmol) in THF (3 mL). After 1h the solution was warmed to room temperature and stirred for a further 1h. The volatiles were removed under reduced pressure and the solid residue was extracted with toluene (12 mL). After filtration through a glass-fritted celite layer, the filtrate was evaporated under vacuum to yield **1** as a brown powder (0.62 g, 84%). Crystallization from a saturated toluene solution at  $-24\text{ }^\circ\text{C}$  gave crystals (M.p.:  $118\text{ }^\circ\text{C}$ , dec) suitable for an X-ray study.  $^1\text{H}$  NMR ( $\text{C}_6\text{D}_6$ ):  $\delta = 1.25$  (d,  $^3J_{\text{HH}}$  = 6.8 Hz, 12H,  $\text{CHMe}_2$ ); 1.35 (s, 18H,  $\text{C}_p\text{CMe}_3$ ); 1.53 (s, 6H,  $=\text{CMe}$ ); 1.75 (s, 18H,  $\text{C}_o\text{CMe}_3$ ); 1.78 (s, 18H,  $\text{C}_o\text{CMe}_3$ ); 5.20-6.60 (m, 2H,  $\text{CHMe}_2$ ); 7.64 (s, 4H, CH of  $\text{Mes}^*$ ).  $^{13}\text{C}$  NMR ( $\text{C}_6\text{D}_6$ ):  $\delta = 10.11$  ( $=\text{CMe}$ ); 22.19 ( $\text{CHMe}_2$ ); 31.53 ( $\text{C}_p\text{CMe}_3$ ); 33.16 and 33.21 ( $\text{C}_o\text{CMe}_3$ ); 35.03 ( $\text{C}_p\text{C}$ );

38.18 and 38.52 (C<sub>o</sub>C); 52.17 (CHMe<sub>2</sub>); 121.26 and 122.03 (C<sub>m</sub>); 126.18 (C=); 140.53 (dd, <sup>1</sup>J<sub>CP</sub> = 82.0 Hz, <sup>5</sup>J<sub>CP</sub> = 11.6 Hz, C<sub>i</sub>); 149.33 (C<sub>p</sub>); 153.34 and 153.57 (C<sub>o</sub>); 168.33 (t, <sup>3</sup>J<sub>CP</sub> = 16.9 Hz, C:); 197.08 (d, <sup>1</sup>J<sub>CP</sub> = 86.3 Hz, C=P). <sup>31</sup>P NMR (C<sub>6</sub>D<sub>6</sub>): δ = 265.7.

### Synthesis of tungsten[bis(phosphaalkenyl) germylene] **3**:

To a solution of **1** (0.30 g, 0.33 mmol in THF (3 mL) was added at -78 °C a solution of (cod)W(CO)<sub>4</sub> (0.13 g, 0.33 mmol) in THF (3 mL). The solution was heated at 60 °C for 3h. The volatiles were removed under reduced pressure and the residue was washed with pentane. The precipitate was dried under reduced pressure to yield **3** as a brown powder (0.29 g, 73%). Crystallization from dichloromethane at -24 °C gave crystals (M.p.: 232 °C, dec) suitable for an X-ray study. <sup>1</sup>H NMR (C<sub>6</sub>D<sub>6</sub>): δ = 1.04 (d, <sup>3</sup>J<sub>HH</sub> = 6.9 Hz, 3H, CHMeMe'); 1.18 (d, <sup>3</sup>J<sub>HH</sub> = 6.9 Hz, 3H, CHMeMe'); 1.27 (d, <sup>3</sup>J<sub>HH</sub> = 6.9 Hz, 3H, CHMeMe'); 1.29 and 1.30 (2s, 2 x 9H, C<sub>p</sub>CMe<sub>3</sub>); 1.37 and 1.44 (2s, 2 x 3H, =CMe); 1.59 and 1.65 (2s, 2 x 9H, C<sub>o</sub>CMe<sub>3</sub>); 1.65 (d, <sup>3</sup>J<sub>HH</sub> = 6.8 Hz, 3H, CHMeMe'); 1.81 and 1.87 (2s, 2 x 9H, C<sub>o</sub>CMe<sub>3</sub>); 5.25 (sept, <sup>3</sup>J<sub>HH</sub> = 6.9 Hz, 1H, CHMeMe'); 6.52 (sept, <sup>3</sup>J<sub>HH</sub> = 6.8 Hz, 1H, CHMeMe'); 7.58 (s, 2H, CH of Mes\*); 7.59-7.62 (m, 2H, CH of Mes\*). <sup>13</sup>C NMR (C<sub>6</sub>D<sub>6</sub>): δ = 9.83 and 10.14 (=CMe); 21.43, 22.06, 22.39 and 22.48 (CHMeMe'); 31.20 and 31.37 (C<sub>p</sub>CMe<sub>3</sub>); 32.68, 32.72, 32.76, 32.81 and 33.85 (C<sub>o</sub>CMe<sub>3</sub>); 35.04 and 35.15 (C<sub>p</sub>C); 37.97, 38.01, 38.55 and 38.80 (C<sub>o</sub>C); 53.31 and 53.36 (CHMeMe'); 121.94, 122.12, 122.19, 122.30 and 122.37 (C<sub>m</sub>); 126.47 and 128.57 (C=); 131.99 (d, <sup>1</sup>J<sub>CP</sub> = 31.8 Hz, C<sub>i</sub>); 137.65 (d, <sup>1</sup>J<sub>CP</sub> = 65.8 Hz, C<sub>i</sub>); 150.50 and 151.96 (C<sub>p</sub>); 153.28, 153.66, 154.73 and 156.31 (C<sub>o</sub>); 157.11 (dd, <sup>3</sup>J<sub>CP</sub> = 11.9 and 19.7 Hz C:); 182.09 (dd, <sup>1</sup>J<sub>CP</sub> = 90.9 Hz, <sup>3</sup>J<sub>CP</sub> = 19.6 Hz, C=P); 187.87 (d, <sup>3</sup>J<sub>CP</sub> = 12.5 Hz, C=PW); 206.26 (d, <sup>2</sup>J<sub>CP</sub> = 11.5 Hz, CO); 208.84 (d, <sup>2</sup>J<sub>CP</sub> = 10.1 Hz, CO); 211.38 (d, <sup>2</sup>J<sub>CP</sub> = 7.9 Hz, CO); 214.16 (d, <sup>2</sup>J<sub>CP</sub> = 36.8 Hz, CO). <sup>31</sup>P NMR (C<sub>6</sub>D<sub>6</sub>): δ = 267.2 (<sup>1</sup>J<sub>PW</sub> = 214.7 Hz, PW); 281.9 (P).

<sup>1</sup>H NMR (CD<sub>2</sub>Cl<sub>2</sub>): δ = 1.34 and 1.36 (2s, 2 x 9H, C<sub>p</sub>CMe<sub>3</sub>); 1.38 (d, <sup>3</sup>J<sub>HH</sub> = 7.1 Hz, 3H, CHMeMe'); 1.44 and 1.46 (2s, 2 x 9H, C<sub>o</sub>CMe<sub>3</sub>); 1.57 (d, <sup>3</sup>J<sub>HH</sub> = 7.0 Hz, 3H, CHMeMe'); 1.62 (s, 9H, C<sub>o</sub>CMe<sub>3</sub>); 1.64 (d, <sup>3</sup>J<sub>HH</sub> = 7.1 Hz, 3H, CHMeMe'); 1.68 (s, 9H, C<sub>o</sub>CMe<sub>3</sub>); 1.74 (d, <sup>3</sup>J<sub>HH</sub> = 6.8 Hz, 3H, CHMeMe'); 2.35 and 2.37 (2s, 2 x 3H, =CMe); 5.22 (sept, <sup>3</sup>J<sub>HH</sub> = 6.9 Hz, 1H, CHMeMe'); 6.21 (sept, <sup>3</sup>J<sub>HH</sub> = 6.9 Hz, 1H, CHMeMe'); 7.40 (s, 2H, CH of Mes\*); 7.44-7.47 (m, 2H, CH of Mes\*). <sup>13</sup>C NMR (CD<sub>2</sub>Cl<sub>2</sub>): δ = 11.39 and 11.61 (=CMe); 22.56, 22.67, 23.35 and 23.45 (CHMeMe'); 31.72, and 31.87 (C<sub>p</sub>CMe<sub>3</sub>); 33.01, 33.05, 33.10, 33.14, 34.17, 34.19, 34.24

and 34.27 ( $C_0CMe_3$ ); 35.74 and 35.89 ( $C_pC$ ); 38.44, 38.54, 39.05 and 39.17 ( $C_0C$ ); 54.01 and 54.38 (CH); 122.53, 122.80, 122.87 and 122.94 ( $C_m$ ); 128.05 and 129.81 (C=); 131.51 (d,  $^1J_{CP} = 31.7$  Hz,  $C_i$ ); 131.93 (d,  $^1J_{CP} = 66.9$  Hz,  $C_i$ ); 151.10 and 152.76 ( $C_p$ ); 153.66, 154.08, 155.24 and 156.24 ( $C_0$ ); 156.96 (dd,  $^3J_{CP} = 10.7$  and  $20.2$  Hz, C:); 182.38 (dd,  $^1J_{CP} = 90.5$  Hz,  $^3J_{CP} = 21.2$  Hz, C=P); 189.40 (dd,  $^1J_{CP} = 12.6$  Hz,  $^3J_{CP} = 12.2$  Hz, C=PW); 206.76 (d,  $^2J_{CP} = 11.7$  Hz, CO); 208.57 (d,  $^2J_{CP} = 10.1$  Hz, CO); 212.44 (d,  $^2J_{CP} = 7.9$  Hz, CO); 214.68 (d,  $^2J_{CP} = 36.6$  Hz, CO).  $^{31}P$  NMR ( $CD_2Cl_2$ ):  $\delta = 264.7$  ( $^1J_{PW} = 210.8$  Hz, PW); 280.37 (P). IR (nujol):  $\nu_{CO}$  (1853, 1883, 1900 and  $2000\text{ cm}^{-1}$ ). HR-MS (CI  $CH_4$ ): ( $C_{53}H_{78}Cl_2GeN_2O_4P_2W$ ):  $[M]^+$  Calcd: 1196.3550, found: 1196.3545

#### Synthesis of molybdenum[bis(phosphaalkenyl) germylene] 4:

To a solution of (nbd)Mo(CO)<sub>4</sub> (0.03 g, 0.11 mmol) in THF (2 mL) was added a solution of **1** (0.10 g, 0.11 mmol) in THF (3 mL) at  $-78\text{ }^\circ\text{C}$ . The solution was heated at  $60\text{ }^\circ\text{C}$  for 3h. The volatiles were removed under reduced pressure and the crude precipitate was washed with pentane. After drying under reduced pressure, a yellow powder of **4** was obtained (0.08 g, 67%). (M.p.:  $198\text{ }^\circ\text{C}$ , dec).  $^1H$  NMR ( $C_6D_6$ ):  $\delta = 1.04$  (d,  $^3J_{HH} = 6.9$  Hz, 3H, CHMeMe'); 1.20 (d,  $^3J_{HH} = 7.0$  Hz, 3H, CHMeMe'); 1.29 and 1.30 (2s, 2 x 9H,  $C_pCMe_3$ ); 1.41 (d,  $^3J_{HH} = 7.0$  Hz, 3H, CHMeMe'); 1.41 and 1.45 (2s, 2 x 3H, =CMe); 1.59 and 1.65 (2s, 2 x 9H,  $C_0CMe_3$ ); 1.65 (d,  $^3J_{HH} = 6.9$  Hz, 3H, CHMeMe'); 1.79 and 1.85 (2s, 2 x 9H,  $C_0CMe_3$ ); 5.28 (sept,  $^3J_{HH} = 6.9$  Hz, 1H, CHMeMe'); 6.66 (sept,  $^3J_{HH} = 6.9$  Hz, 1H, CHMeMe'); 7.58 (s, 2H, CH of Mes\*); 7.59-7.61 (m, 2H, CH of Mes\*).  $^{31}P$  NMR ( $C_6D_6$ ):  $\delta = 280.2$  (PMo); 296.2 (P).

$^1H$  NMR ( $CD_2Cl_2$ ):  $\delta = 1.33$  and  $1.35$  (2s, 2 x 9H,  $C_pCMe_3$ ); 1.36 (d,  $^3J_{HH} = 7.7$  Hz, 3H, CHMeMe'); 1.44 and 1.45 (2s, 2 x 9H,  $C_0CMe_3$ ); 1.56 (d,  $^3J_{HH} = 7.0$  Hz, 3H, CHMeMe'); 1.61 (s, 9H,  $C_0CMe_3$ ); 1.63 (d,  $^3J_{HH} = 7.2$  Hz, 3H, CHMeMe'); 1.66 (s, 9H,  $C_0CMe_3$ ); 1.74 (d,  $^3J_{HH} = 6.9$  Hz, 3H, CHMeMe'); 2.33 and 2.36 (2s, 2 x 3H, =CMe); 5.23 (sept,  $^3J_{HH} = 6.9$  Hz, 1H, CHMeMe'); 6.36 (sept,  $^3J_{HH} = 7.0$  Hz, 1H, CHMeMe'); 7.39 (s, 2H, CH of Mes\*); 7.42-7.45 (m, 2H, CH of Mes\*).  $^{13}C$  NMR ( $CD_2Cl_2$ ):  $\delta = 11.40$  and  $11.62$  (=CMe); 22.59, 22.64, 23.36 and 23.47 ( $CHMe_2$ ); 31.73, and 31.86 ( $C_pCMe_3$ ); 32.98, 33.01, 33.07, 33.09, 34.07, 34.10, 34.13 and 34.17 ( $C_0CMe_3$ ); 35.72, and 35.84 ( $C_pC$ ); 38.42, 38.52, 38.96 and 39.09 ( $C_0C$ ); 51.84 and 53.17 (CHMeMe'); 122.47, 122.69, 122.76 and 122.84 ( $C_m$ ); 128.00 and 129.61 (C=); 133.27 (d,  $^1J_{CP} = 38.5$  Hz,  $C_i$ ); 138.16 (d,  $^1J_{CP} = 66.6$  Hz,  $C_i$ ); 150.98 and 152.52 ( $C_p$ ); 153.59, 154.04, 155.08

and 155.98 (C<sub>o</sub>); 158.79 (dd, <sup>3</sup>J<sub>CP</sub> = 10.7 and 18.4 Hz, C:); 182.57 (dd, <sup>1</sup>J<sub>CP</sub> = 12.6 Hz, <sup>3</sup>J<sub>CP</sub> = 10.3 Hz, C=PW); 185.87 (dd, <sup>1</sup>J<sub>CP</sub> = 91.7 Hz, <sup>3</sup>J<sub>CP</sub> = 18.8 Hz, C=P); 213.47 (d, <sup>2</sup>J<sub>CP</sub> = 12.3 Hz, CO); 215.38 (d, <sup>2</sup>J<sub>CP</sub> = 11.5 Hz, CO); 221.22 (d, <sup>2</sup>J<sub>CP</sub> = 9.4 Hz, CO); 224.04 (d, <sup>2</sup>J<sub>CP</sub> = 9.4 Hz, CO). <sup>31</sup>P (CD<sub>2</sub>Cl<sub>2</sub>): δ = 278.7 (PMo); 293.3 (P). IR (nujol): ν<sub>CO</sub> (1858, 1892, 1908 and 2005 cm<sup>-1</sup>). HR-MS (CI, CH<sub>4</sub>): (C<sub>53</sub>H<sub>78</sub>MoCl<sub>2</sub>GeN<sub>2</sub>O<sub>4</sub>P<sub>2</sub>): [M]<sup>+</sup> Calcd: 1108.3094, found: 1108.3123.

### Synthesis of chlorogold[bis(phosphaalkenyl) germylene] 5:

To a solution of **1** (0.10 g, 0.11 mmol) in toluene (1 mL) was added a solution of ClAuS(Me)<sub>2</sub> (0.03 g, 0.11 mmol) in toluene (1 mL). After 5 minutes under magnetic stirring in the absence of light, the solution was filtrated and the volatiles removed under reduced pressure to yield **5** as a brown powder (0.13 g, 100%). Crystallization from dichloromethane at room temperature gave crystals (M.p.: 127 °C) suitable for an X-ray study. <sup>1</sup>H NMR (C<sub>6</sub>D<sub>6</sub>): δ = 1.18 (d, <sup>3</sup>J<sub>HH</sub> = 6.9 Hz, 12H, CHMe<sub>2</sub>); 1.30 (s, 18H, C<sub>p</sub>CMe<sub>3</sub>); 1.50 (s, 6H, =CMe); 1.66 (s, 18H, C<sub>o</sub>CMe<sub>3</sub>); 1.67 (s, 18H, C<sub>o</sub>CMe<sub>3</sub>); 5.87-6.25 (m, 2H, CHMe<sub>2</sub>); 7.60 (s, 4H, CH of Mes\*). <sup>13</sup>C NMR (C<sub>6</sub>D<sub>6</sub>): δ = 10.69 (=CMe); 22.11 (CHMe<sub>2</sub>); 31.38 (C<sub>p</sub>CMe<sub>3</sub>); 33.24 and 33.40 (C<sub>o</sub>CMe<sub>3</sub>); 35.03 (C<sub>p</sub>C); 38.03 and 38.51 (C<sub>o</sub>C); 52.86 (CHMe<sub>2</sub>); 121.77 and 122.54 (C<sub>m</sub>); 129.19 (C=); 136.70 (dd, <sup>1</sup>J<sub>CP</sub> = 75.6 Hz, <sup>5</sup>J<sub>CP</sub> = 8.4 Hz, C<sub>i</sub>); 150.56 (C<sub>p</sub>); 153.60 (t, <sup>3</sup>J<sub>CP</sub> = 14.7 Hz, C:); 153.73 and 154.25 (C<sub>o</sub>); 175.14 (dd, <sup>1</sup>J<sub>CP</sub> = 95.9 Hz, <sup>3</sup>J<sub>CP</sub> = 15.4 Hz, C=P). <sup>31</sup>P NMR (C<sub>6</sub>D<sub>6</sub>): δ = 293.0. HR-MS (CI, CH<sub>4</sub>): (C<sub>49</sub>H<sub>78</sub>AuCl<sub>3</sub>GeN<sub>2</sub>P<sub>2</sub>): [M]<sup>+</sup> Calcd: 1132.3584, found: 1132.3538.

### Synthesis of iodogold[bis(phosphaalkenyl) germylene] 6:

A solution of AuI (0.04 g, 0.11 mmol) in toluene (1 mL) was added to a solution of **1** (0.10 g, 0.11 mmol) in toluene (2 mL). After 5 minutes under magnetic stirring in the absence of light, the solution was filtrated and the volatiles removed under reduced pressure to yield **6** as an orange powder (0.13 g, 97%). Crystallization from benzene at room temperature gave crystals (M.p.: 121 °C) suitable for an X-ray study. <sup>1</sup>H NMR (C<sub>6</sub>D<sub>6</sub>): δ = 1.22 (d, <sup>3</sup>J<sub>HH</sub> = 7.0 Hz, 12H, CHMe<sub>2</sub>); 1.30 (s, 18H, C<sub>p</sub>CMe<sub>3</sub>); 1.58 (s, 6H, =CMe); 1.65 (s, 18H, C<sub>o</sub>CMe<sub>3</sub>); 1.67 (s, 18H, C<sub>o</sub>CMe<sub>3</sub>); 5.85-6.32 (m, 2H, CHMe<sub>2</sub>); 7.59 (s, 4H, CH of Mes\*). <sup>13</sup>C NMR (C<sub>6</sub>D<sub>6</sub>): δ = 10.68 (=CMe); 22.23 (CHMe<sub>2</sub>); 31.37 (C<sub>p</sub>CMe<sub>3</sub>); 33.22 and 33.58 (C<sub>o</sub>CMe<sub>3</sub>); 35.01 (C<sub>p</sub>C); 38.00 and 38.46 (C<sub>o</sub>C); 52.62 (CHMe<sub>2</sub>); 121.72 and 122.57 (C<sub>m</sub>); 128.54 (C=); 136.71 (dd, <sup>1</sup>J<sub>CP</sub> = 77.8 Hz, <sup>5</sup>J<sub>CP</sub> = 11.1 Hz, C<sub>i</sub>); 150.54 (C<sub>p</sub>); 153.67 and 154.39 (C<sub>o</sub>); 155.29 (t, <sup>3</sup>J<sub>CP</sub> = 15.7 Hz, C:); 175.45

(dd,  $^1J_{CP} = 97.0$  Hz,  $^3J_{CP} = 16.7$  Hz, C=P).  $^{31}\text{P}$  NMR ( $\text{C}_6\text{D}_6$ ):  $\delta = 292.6$ . HR-MS (CI,  $\text{CH}_4$ ): ( $\text{C}_{49}\text{H}_{78}\text{AuCl}_2\text{GeIN}_2\text{P}_2$ ):  $[\text{M}]^+$  Calcd: 1224.2944, found: 1224.2842.

### **X-ray Structure Determinations**

X-ray data were collected at low temperature (193(2) K) using an oil-coated shock-cooled crystal on a Bruker Kappa APEX II Quazar diffractometer with Mo  $\text{K}\alpha$  radiation ( $\lambda = 0.71073$  Å) with graphite-monochromated Mo $\text{K}\alpha$  radiation (wavelength = 0.71073 Å) by using phi- and omega-scans. The data were integrated with SAINT, and an empirical absorption correction with SADABS was applied.<sup>3</sup> The structures were solved by direct methods, using SHELXS-97<sup>4</sup> and refined using the least-squares method on  $F^2$ .<sup>5</sup> All non-H atoms were treated anisotropically. The H atoms were located by difference Fourier maps and refined with a riding model. Structural data are summarized in Table 1.

|                                                 | <b>1</b>                                                                                                                | <b>3</b>                                                                                                                                  | <b>5</b>                                                                                                                      | <b>6</b>                                                                                                                     |
|-------------------------------------------------|-------------------------------------------------------------------------------------------------------------------------|-------------------------------------------------------------------------------------------------------------------------------------------|-------------------------------------------------------------------------------------------------------------------------------|------------------------------------------------------------------------------------------------------------------------------|
| Empirical formula                               | C <sub>49</sub> H <sub>78</sub> Cl <sub>2</sub> GeN <sub>2</sub> P <sub>2</sub> ,<br>2 (C <sub>7</sub> H <sub>8</sub> ) | C <sub>53</sub> H <sub>78</sub> Cl <sub>2</sub> GeN <sub>2</sub> O <sub>4</sub> P <sub>2</sub> W,<br>3 (CH <sub>2</sub> Cl <sub>2</sub> ) | C <sub>49</sub> H <sub>78</sub> AuCl <sub>3</sub> GeN <sub>2</sub> P <sub>2</sub> ,<br>2.5 (CH <sub>2</sub> Cl <sub>2</sub> ) | C <sub>49</sub> H <sub>78</sub> AuCl <sub>2</sub> GeIN <sub>2</sub> P <sub>2</sub> ,<br>1.5 (C <sub>6</sub> H <sub>6</sub> ) |
| Formula weight (g/mol)                          | 1084.83                                                                                                                 | 1451.23                                                                                                                                   | 1345.30                                                                                                                       | 1341.59                                                                                                                      |
| Temperature (K)                                 | 193(2)                                                                                                                  | 193(2)                                                                                                                                    | 193(2)                                                                                                                        | 193(2)                                                                                                                       |
| λ(Mo Kα) (Å)                                    | 0.71073                                                                                                                 | 0.71073                                                                                                                                   | 0.71073                                                                                                                       | 0.71073                                                                                                                      |
| Crystal system                                  | Triclinic                                                                                                               | Triclinic                                                                                                                                 | Triclinic                                                                                                                     | Monoclinic                                                                                                                   |
| Space group                                     | <i>P</i> $\bar{1}$                                                                                                      | <i>P</i> $\bar{1}$                                                                                                                        | <i>P</i> $\bar{1}$                                                                                                            | <i>C</i> 2/ <i>c</i>                                                                                                         |
| a (Å)                                           | 13.9844(4)                                                                                                              | 12.0774(6)                                                                                                                                | 11.3212(6)                                                                                                                    | 12.1895(9)                                                                                                                   |
| b (Å)                                           | 14.0830(4)                                                                                                              | 14.8952(8)                                                                                                                                | 15.4945(7)                                                                                                                    | 37.193(3)                                                                                                                    |
| c (Å)                                           | 18.5657(6)                                                                                                              | 21.9932(16)                                                                                                                               | 18.5887(10)                                                                                                                   | 27.7641(18)                                                                                                                  |
| α (deg.)                                        | 79.5190(10)                                                                                                             | 100.256(3)                                                                                                                                | 79.533(2)                                                                                                                     | 90                                                                                                                           |
| β (deg.)                                        | 75.8570(10)                                                                                                             | 96.379(3)                                                                                                                                 | 87.667(2)                                                                                                                     | 95.446(3)                                                                                                                    |
| γ (deg.)                                        | 63.2850(10)                                                                                                             | 113.219(2)                                                                                                                                | 77.006(2)                                                                                                                     | 90                                                                                                                           |
| Volume (Å <sup>3</sup> )                        | 3156.09(16)                                                                                                             | 3505.3(4)                                                                                                                                 | 3124.4(3)                                                                                                                     | 12530.3(16)                                                                                                                  |
| Z                                               | 2                                                                                                                       | 2                                                                                                                                         | 2                                                                                                                             | 8                                                                                                                            |
| Density calculated (g/cm <sup>3</sup> )         | 1.142                                                                                                                   | 1.375                                                                                                                                     | 1.430                                                                                                                         | 1.422                                                                                                                        |
| Absorption coefficient (mm <sup>-1</sup> )      | 0.658                                                                                                                   | 2.459                                                                                                                                     | 3.252                                                                                                                         | 3.483                                                                                                                        |
| F(000)                                          | 1164                                                                                                                    | 1476                                                                                                                                      | 1366                                                                                                                          | 5416                                                                                                                         |
| Crystal size (mm)                               | 0.30 x 0.12 x 0.10                                                                                                      | 0.38 x 0.18 x 0.08                                                                                                                        | 0.34 x 0.10 x 0.08                                                                                                            | 0.10 x 0.05 x 0.02                                                                                                           |
| θ range (deg.)                                  | 5.10 - 26.37                                                                                                            | 5.11 - 26.37                                                                                                                              | 5.16 - 28.28                                                                                                                  | 5.15 - 26.37                                                                                                                 |
| Index range h k l                               | -17 ≤ h ≤ 14<br>-17 ≤ k ≤ 17<br>-23 ≤ l ≤ 22                                                                            | -15 ≤ h ≤ 15<br>-18 ≤ k ≤ 18<br>-27 ≤ l ≤ 27                                                                                              | -15 ≤ h ≤ 15<br>-20 ≤ k ≤ 20<br>-24 ≤ l ≤ 24                                                                                  | -15 ≤ h ≤ 15<br>-44 ≤ k ≤ 46<br>-34 ≤ l ≤ 33                                                                                 |
| Reflections collected / Unique                  | 48874 / 12787<br>R(int) = 0.0490                                                                                        | 63975 / 14094<br>R(int) = 0.0361                                                                                                          | 65805 / 15160<br>R(int) = 0.0365                                                                                              | 124173 / 12726<br>R(int) = 0.0988                                                                                            |
| Completeness to θ (%)                           | 98.8                                                                                                                    | 98.2                                                                                                                                      | 97.7                                                                                                                          | 99.2                                                                                                                         |
| Data/Restraints/Parameters                      | 12787 / 241 / 720                                                                                                       | 14094 / 103 / 748                                                                                                                         | 15160 / 230 / 706                                                                                                             | 12726 / 244 / 708                                                                                                            |
| Goodness-of-fit                                 | 1.019                                                                                                                   | 1.055                                                                                                                                     | 1.022                                                                                                                         | 1.047                                                                                                                        |
| R1, wR2 ( <i>I</i> > 2(σ) <i>I</i> )            | 0.0458, 0.1114                                                                                                          | 0.0347, 0.0877                                                                                                                            | 0.0325, 0.0723                                                                                                                | 0.0452, 0.0805                                                                                                               |
| R1, wR2 (all data)                              | 0.0730, 0.1262                                                                                                          | 0.0445, 0.0930                                                                                                                            | 0.0490, 0.0790                                                                                                                | 0.0875, 0.0917                                                                                                               |
| Largest diff. peak and hole (eÅ <sup>-3</sup> ) | 1.060, -0.387                                                                                                           | 1.226, -0.817                                                                                                                             | 0.906, -0.909                                                                                                                 | 0.598, -0.814                                                                                                                |

**Table 1.** Crystallographic data

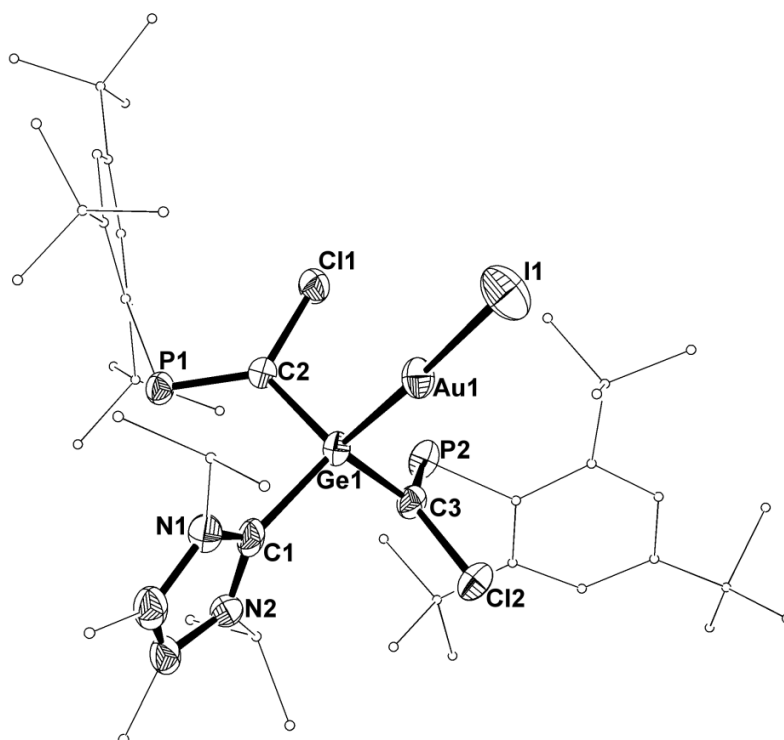

**Fig. 3.** Molecular structure of compound **6** in the solid state (50% probability level for the thermal ellipsoids). For clarity, hydrogen atoms and crystallization solvent (benzene) are omitted. Me, *i*Pr and Mes\* groups are simplified. Selected bond distances [Å] and bond angles [°]: Ge1–C1 2.030(6), Ge1–C2 1.979(5), Ge1–C3 1.981(5), Au1–Ge1 2.3641(6), Au1–I1 2.5783(5), P1–C2 1.671(5), P2–C3 1.671(6), Cl1–C2 1.740(5), Cl2–C3 1.752(5) ; I1–Au1–Ge 176.75(2), C2–Ge1–C3 107.1(2), C1–Ge1–C2 108.9(2), C1–Ge1–C3 101.2(2), C1–Ge1–Au1 114.08(17), C2–Ge1–Au1 111.01(15), C3–Ge1–Au1 113.88(9).

- 1 P. A. Rugar, V. N. Staroverov, P. J. Ragona and K. M. Baines, *J. Am. Chem. Soc.*, 2007, **129**, 15138.
- 2 S. J. Goede and F. Bickelhaupt, *Chem. Ber.*, 1991, **124**, 2677.
- 3 (a) Madison, SAINT-NT; Bruker AXS Inc.; Wisconsin 2000.(b) SADABS; Program for data correction; Bruker-AXS M.
- 4 G. M. Sheldrick, *Acta Crystallogr.*, 1990, **A46**, 467.
- 5 SHELXL-97, Program for Crystal Structure Refinement, G. M. Sheldrick; University of Göttingen, *Acta Crystallogr., Sect. A*, 2008, **64**, 112.
